# Supplementary material
Source: ML conference proceedings conference paper supplement (https://openreview.net/forum?id=zrUEHZ6s9C)
Supplement: supplementary_material [file attachment]

## A Implementation Details

### A.1 Deep Active Learning Decomposition

For any uncertainty sampling algorithm, picking the top- $B$  most uncertain examples can be easily decomposed into an iterative procedure that picks the next most uncertain example. Next, for diversity based deep active learning algorithms, one usually rely on a greedy iterative procedure to collect a batch, e.g. K-means++ for BADGE [Ash et al., 2019] and greedy K-centers for Coreset [Sener and Savarese, 2017]. Lastly, deep active learning algorithms such as Cluster-Margin [Citovsky et al., 2021] and GALAXY [Zhang et al., 2022] have already proposed their algorithms as iterative procedures that select unlabeled examples sequentially.

### A.2 Implementation of Modified Submodular

Instead of requiring access to a balanced holdout set [Kothawade et al., 2021], we construct the balanced set using training examples. We use the Submodular Mutual Information function FLQMI as suggested by Table 1 of [Kothawade et al., 2021]. The proposed greedy submodular optimization is itself an iterative procedure that selects one example at a time. While SIMILAR usually performs well, our modification that discards the holdout set is unfortunately ineffective in our experiments. This is primarily due to the lack of the holdout examples, which may often happen in practical scenarios.

### A.3 Stanford Car Multi-label Dataset

We transform the original labels into 10 binary classes of

1. If the brand is "Audi".
2. If the brand is "BMW".
3. If the brand is "Chevrolet".
4. If the brand is "Dodge".
5. If the brand is "Ford".
6. If the car type is "Convertible".
7. If the car type is "Coupe".
8. If the car type is "SUV".
9. If the car type is "Van".
10. If the car is made in or before 2009.

### A.4 Negative Weighting for Common Classes

For multi-label classifications, for some classes, there could be more positive associations (label of 1s) than negative associations (label of 0s). Therefore, in those classes, the rarer labels are negative. In class diverse reward  $\langle v_{div}^t, y \rangle$  in Section 4.1, we implement an additional weighting of  $\mathbb{1}_{rare}^t * v_{div}^t$ , where  $*$  denotes an elementwise multiplication. Here, each element  $\mathbb{1}_{rare,i}^t \in \{1, -1\}$  takes value  $-1$  when  $\text{COUNT}^t(i)$  is larger than half the size of labeled set. This negative weighting can be seen as upsampling negative class associations when positive associations are the majority.

### A.5 Model Training

All of our experiments are conducted using the ResNet-18 architecture [He et al., 2016] pretrained on ImageNet. We use the Adam optimizer [Kingma and Ba, 2014] with learning rate of  $1e-4$  and weight decay of  $5e-5$ .

### A.6 Baseline Algorithms

In the original GALAXY work by [Zhang et al., 2022], their algorithm construct  $K$  one-vs-rest linear graphs, one for each class. GALAXY requires finding the shortest shortest path among all

532  $K$  graphs, an operation whose computation scales linearly in  $K$ . When  $K$  is large, this becomes  
 533 computationally prohibitive to run. Therefore, we instead include  $K$  separate GALAXY algorithms,  
 534 each only bisecting on one of the one-vs-rest graphs. This is equivalent with running  $K$  GALAXY  
 535 algorithms, one for each binary classification task between class  $i \in [K]$  and the rest. As a baseline,  
 536 we interleave these algorithms uniformly at random.

537 For Uncertainty sampling in multi-label settings, we simply have  $K$  individual uncertainty sampling  
 538 algorithms, where the  $i$ -th algorithm samples the most uncertain example based only on the binary  
 539 classification task of class  $i$ .

## 540 B Proof of Theorem 5.2

541 Our proof follows a similar procedure from regret analysis for Thompson Sampling of the stochastic  
 542 multi-armed bandit problem [Lattimore and Szepesvári, 2020]. Let  $\alpha^t := \{\alpha^{t,j}\}_{j=1}^B$  and  $y^t :=$   
 543  $\{y^{t,j}\}_{j=1}^B$  denote the actions and observations from the  $i$ -th round. We define the history up to  $t$  as  
 544  $H_t = \{\alpha^1, y^1, \alpha^2, y^2, \dots, \alpha^{t-1}, y^{t-1}\}$ . Moreover, for each  $i \in [M]$ , we define  $H_{t,i} = \{y^{t',j} \in H_t :$   
 545  $\alpha^{t',j} = i\}$  as the history of all observations made by choosing the  $i$ -th arm (algorithm).

546 Now we analyze reward estimates at each round  $t$ . When given history  $H_t$  and arm  $i \in [M]$ , each  
 547 observation  $y \in H_{t,i}$  is an unbiased estimate of  $\theta^i$  as  $y \sim \mathbb{P}_{\theta^i}$ . Therefore, for any fixed  $v^t$ ,  $\langle v^t, y \rangle$  is  
 548 an unbiased estimate of the expected reward  $\langle v^t, \theta^i \rangle$ , which we denote by  $\mu^{t,i}$ .

549 For each arm  $i$ , we can then obtain empirical reward estimate  $\bar{\mu}^{t,i}$  of the true expected reward  $\mu^{t,i}$   
 550 by  $\bar{\mu}^{t,i} := \frac{1}{|H_{t,i}|} \sum_{y \in H_{t,i}} \langle v^t, y \rangle$  where  $\bar{\mu}^{t,i} = 0$  if  $|H_{t,i}| = 0$ . Since expected rewards and reward  
 551 estimates are bounded by  $[-1, 1]$ , by standard sub-Gaussian tail bounds, we can then construct  
 552 confidence interval,

$$\mathbb{P}(\forall i \in [M], t \in [T], |\bar{\mu}^{t,i} - \mu^{t,i}| \leq d^{t,i}) \geq 1 - \frac{1}{T}$$

553 where  $d^{t,i} := \sqrt{\frac{8 \log(MT^2)}{|H_{t,i}|}}$ . Additionally, we define upper confidence bound as  $U^{t,i} =$   
 554  $\text{clip}_{[-1,1]}(\bar{\mu}^{t,i} + d^{t,i})$ .

555 At each iteration  $t$ , we have the posterior distribution  $\mathbb{P}(\Theta = \cdot | H_t)$  of the ground truth  $\Theta =$   
 556  $\{\theta^i\}_{i=1}^M$ .  $\hat{\Theta} = \{\hat{\theta}^i\}_{i=1}^M$  is sampled from this posterior. Consider  $i_*^t = \arg \max_{i \in [M]} \langle v^t, \theta^i \rangle$  and  
 557  $\alpha^{t,j} = \arg \max_{i \in [M]} \langle v^t, \hat{\theta}^i \rangle$ . The distribution of  $i_*^t$  is determined by the posterior  $\mathbb{P}(\Theta = \cdot | H_t)$ . The  
 558 distribution of  $\alpha^{t,j}$  is determined by the distribution of  $\hat{\Theta}$ , which is also  $\mathbb{P}(\Theta = \cdot | H_t)$ . Therefore,  $i_*^t$   
 559 and  $\alpha^{t,j}$  are identically distributed. Furthermore, since the upper confidence bounds are deterministic  
 560 functions of  $i$  when given  $H_t$ , we then have  $\mathbb{E}[U^{t,\alpha^{t,j}} | H_t] = \mathbb{E}[U^{t,i_*^t} | H_t]$ .

561 As a result, we upper bound the Bayesian regret by

$$\begin{aligned} BR(\text{TAILOR}) &= \mathbb{E} \left[ \sum_{t=1}^T \sum_{j=1}^B \mu^{t,i_*^t} - \mu^{t,\alpha^{t,j}} \right] \\ &= \mathbb{E} \left[ \sum_{t=1}^T \sum_{j=1}^B (\mu^{t,i_*^t} - U^{t,i_*^t}) + (U^{t,\alpha^{t,j}} - \mu^{t,\alpha^{t,j}}) \right]. \end{aligned}$$

562 Now, note that since  $\bar{\mu}^{t,i} \in [-1, 1]$  we have  $\text{clip}_{[-1,1]}(\bar{\mu}^{t,i} + d^{t,i}) = \text{clip}_{[-\infty,1]}(\bar{\mu}^{t,i} + d^{t,i})$ ,  
 563 where only the upper clip takes effect. Based on the sub-Gaussian confidence intervals  
 564  $\mathbb{P}(\forall i \in [M], t \in [T], |\bar{\mu}^{t,i} - \mu^{t,i}| \leq d^{t,i}) \geq 1 - \frac{1}{T}$ , we can derive the following two confidence

565 bounds:

$$\begin{aligned}
\mathbb{P}(\forall i \in [M], t \in [T], \mu^{t,i} > U^{t,i}) &= \mathbb{P}(\forall i \in [M], t \in [T], \mu^{t,i} > \text{clip}_{[-1,1]}(\bar{\mu}^{t,i} + d^{t,i})) \\
&= \mathbb{P}(\forall i \in [M], t \in [T], \mu^{t,i} > \bar{\mu}^{t,i} + d^{t,i}), \text{ since } \mu^{t,i} \leq 1 \\
&= \mathbb{P}(\forall i \in [M], t \in [T], \mu^{t,i} - \bar{\mu}^{t,i} > d^{t,i}) \leq \frac{1}{2T} \\
\mathbb{P}(\forall i \in [M], t \in [T], U^{t,i} - \mu^{t,i} > 2d^{t,i}) &= \mathbb{P}(\forall i \in [M], t \in [T], \text{clip}_{[-1,1]}(\bar{\mu}^{t,i} + d^{t,i}) - \mu^{t,i} > 2d^{t,i}) \\
&\leq \mathbb{P}(\forall i \in [M], t \in [T], \bar{\mu}^{t,i} + d^{t,i} - \mu^{t,i} > 2d^{t,i}) \\
&= \mathbb{P}(\forall i \in [M], t \in [T], \bar{\mu}^{t,i} - \mu^{t,i} > d^{t,i}) \leq \frac{1}{2T}.
\end{aligned}$$

566 Now with the decomposition,

$$\begin{aligned}
BR(\text{TAILOR}) &= \mathbb{E} \left[ \sum_{t=1}^T \sum_{j=1}^B \mu^{t,i_*^t} - \mu^{t,\alpha^{t,j}} \right] \\
&= \mathbb{E} \left[ \sum_{t=1}^T \sum_{j=1}^B \mu^{t,i_*^t} - U^{t,i_*^t} \right] + \mathbb{E} \left[ \sum_{t=1}^T \sum_{j=1}^B U^{t,\alpha^{t,j}} - \mu^{t,\alpha^{t,j}} \right]
\end{aligned}$$

567 we can bound the two expectations individually.

568 First, to bound  $\mathbb{E} \left[ \sum_{t=1}^T \sum_{j=1}^B \mu^{t,i_*^t} - U^{t,i_*^t} \right]$ , we note that  $\mu^{t,i_*^t} - U^{t,i_*^t}$  is negative with high  
569 probability. Also, the maximum value this can take is bounded by 2 as  $\mu^{t,i}, U^{t,i} \in [-1, 1]$ . Therefore,  
570 we have

$$\mathbb{E} \left[ \sum_{t=1}^T \sum_{j=1}^B \mu^{t,i_*^t} - U^{t,i_*^t} \right] \leq \left( \sum_{t=1}^T \sum_{j=1}^B 0 \cdot \mathbb{P}(\mu^{t,i_*^t} \leq U^{t,i_*^t}) + 2 \cdot \mathbb{P}(\mu^{t,i_*^t} > U^{t,i_*^t}) \right) \leq 2TB \cdot \frac{1}{2T} = B.$$

571 Next, to bound  $\mathbb{E} \left[ \sum_{t=1}^T \sum_{j=1}^B U^{t,\alpha^{t,j}} - \mu^{t,\alpha^{t,j}} \right]$  we decompose it similar to the above:

$$\begin{aligned}
\mathbb{E} \left[ \sum_{t=1}^T \sum_{j=1}^B U^{t,\alpha^{t,j}} - \mu^{t,\alpha^{t,j}} \right] &\leq \left( \sum_{t=1}^T \sum_{j=1}^B 2\mathbb{P}(U^{t,\alpha^{t,j}} - \mu^{t,\alpha^{t,j}} > 2d^{t,i}) \right) + \left( \sum_{t=1}^T \sum_{j=1}^B 2d^{t,i} \right) \\
&\leq B + \left( \sum_{t=1}^T \sum_{j=1}^B \sqrt{\frac{32 \log(MT^2)}{1 \vee |H_{t,\alpha^{t,j}}|}} \right)
\end{aligned}$$

572 where recall that  $|H_{t,i}|$  is the number of samples collected using algorithm  $i$  in rounds  $\leq t$ .

573 To bound the summation, we utilize the fact that  $\frac{1}{1 \vee |H_{t,i}|} \leq \frac{B}{k}$  for each  $k \in [|H_{t,i}|, |H_{t+1,i}|]$ , since  
574  $|H_{t+1,i}| - |H_{t,i}| \leq B$ . As a result, we get

$$\begin{aligned}
&\sum_{t=1}^T \sum_{j=1}^B \sqrt{\frac{32 \log(MT^2)}{1 \vee |H_{t,\alpha^{t,j}}|}} \\
&\leq \sum_{t=1}^T \sum_{i=1}^M \sum_{k=1}^{|H_{T,i}|} \sqrt{\frac{32 \log(MT^2) \cdot B}{k}} \\
&\leq O(\sqrt{B(\log T + \log M)} \sum_{i=1}^M \sqrt{|H_{T,i}|}) \\
&\leq O(\sqrt{B(\log T + \log M)}) \cdot O(\sqrt{BMT}) = O(B\sqrt{MT(\log T + \log M)})
\end{aligned}$$

575 where last two inequalities follow from simple algebra and the fact that  $\sum_{i=1}^M |H_{T,i}| = TB$ .

576 Finally, to combine all of the bounds above, we get  $BR(\text{TAILOR}) \leq B + B +$   
577  $O(B\sqrt{MT(\log T + \log M)}) = O(B\sqrt{MT(\log T + \log M)})$ .

## 578 C Time Complexity

579 Let  $N_{train}$  denote the total neural network training. The time complexity of collecting each batch  
 580 for each active learning algorithm  $\mathcal{A}_i$  can be separated into  $P_i$  and  $Q_i$ , which are the computa-  
 581 tion complexity for preprocessing and selection of each example respectively. As examples of  
 582 preprocessing, BADGE [Ash et al., 2019] computes gradient embeddings, SIMILAR [Kothawade  
 583 et al., 2021] further also compute similarity kernels, GALAXY [Zhang et al., 2022] constructs  
 584 linear graphs, etc. The selection complexities are the complexities of each iteration of K-means++  
 585 in BADGE, greedy submodular optimization in SIMILAR, and shortest shortest path computa-  
 586 tion in GALAXY. Therefore, for any individual algorithm  $\mathcal{A}_i$ , the computation complexity is then  
 587  $O(N_{train} + TP_i + TBQ_i)$  where  $T$  is the total number of rounds and  $B$  is the batch size. When  
 588 running TAILOR, as we do not know which algorithms are selected, we provide a worst case upper  
 589 bound of  $O(N_{train} + T \cdot (\sum_{i=1}^M P_i) + TB \cdot \max_{i \in [M]} Q_i)$ , where the preprocessing is done for every  
 590 candidate algorithm. In practice, some of the preprocessing operations such as gradient embedding  
 591 computation could be shared among multiple algorithms, thus only need to be computed once. While  
 592 the computation of rewards and Thompson sampling updates incur some extra complexity, they  
 593 are usually dominated in practice by the complexity of neural network training and running each  
 594 candidate algorithm.

## D Study of Candidate Algorithms

We compare the performance when we use the following two sets of candidate algorithms:

1. **Active learning algorithms only:** Uncertainty sampling, GALAXY and EMAL for multi-label classification; Uncertainty sampling, GALAXY and BADGE for multi-class classification.
2. **Active learning and search algorithms:** Uncertainty sampling, GALAXY, MLP, EMAL and Weak Sup for multi-label classification; Uncertainty sampling, GALAXY, MLP, BADGE and Modified Submodular for multi-class classification.

Note Modified Submodular is classified as an active search algorithms since we are using a balanced set of training examples as the conditioning set. We are effectively searching for examples similar to the ones that are annotated in these classes.

As shown in Figures 5 and 6, regardless of the meta algorithm, the performance is better when using active learning algorithms as candidates only. Nonetheless, even with active search algorithms as candidates, TAILOR still outperforms other meta active learning algorithms.

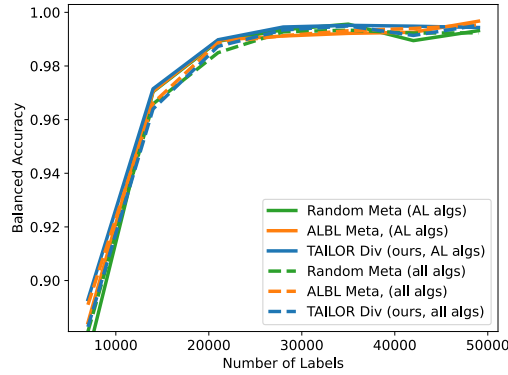

Figure 5: SVHN, Balanced Accuracy

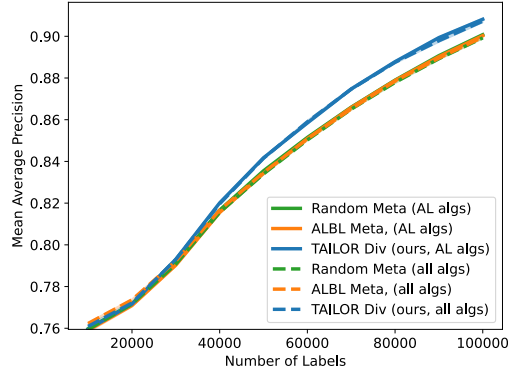

Figure 6: CelebA, mAP

## 609 E Full Results

610 All of the results below are averaged from four individual trials except for Imagenet, which is the  
 611 result of a single trial.

### 612 E.1 Multi-label Classification

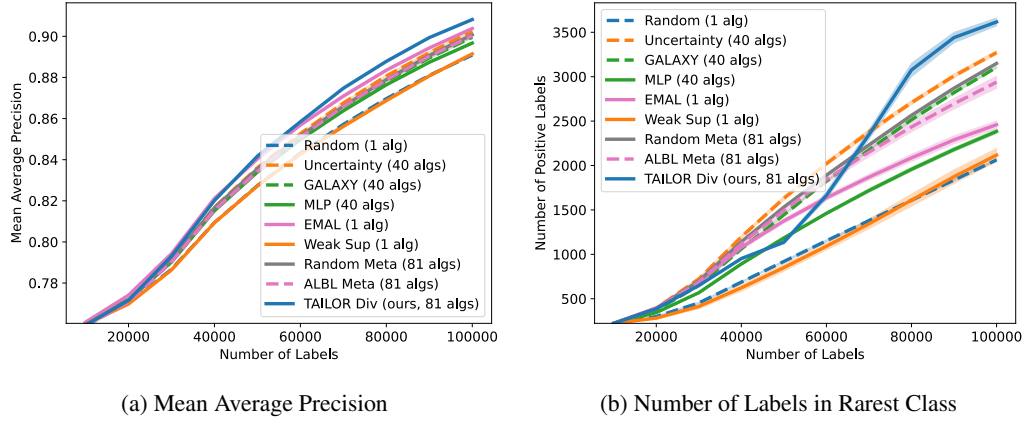

Figure 7: CelebA

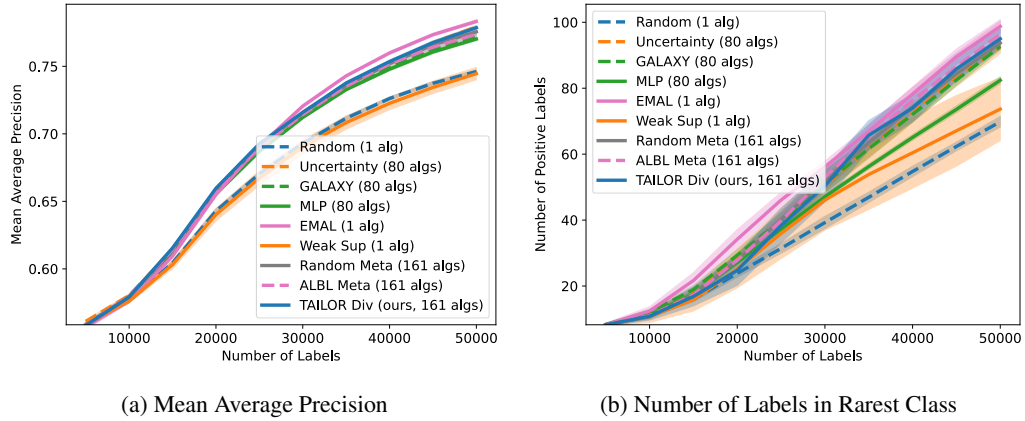

Figure 8: COCO

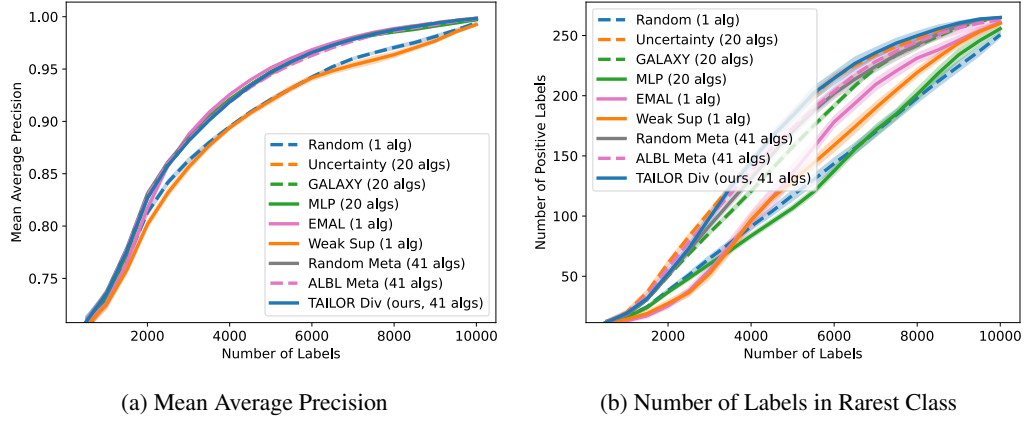

Figure 9: VOC

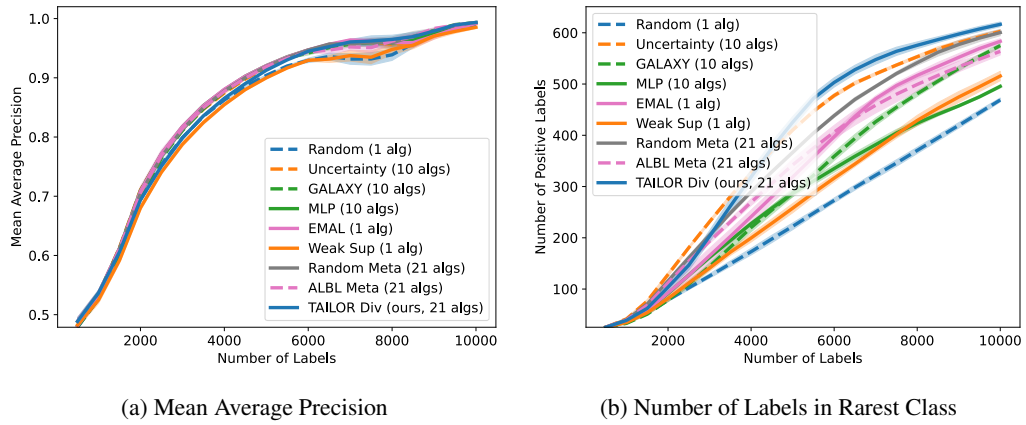

Figure 10: Stanford Car

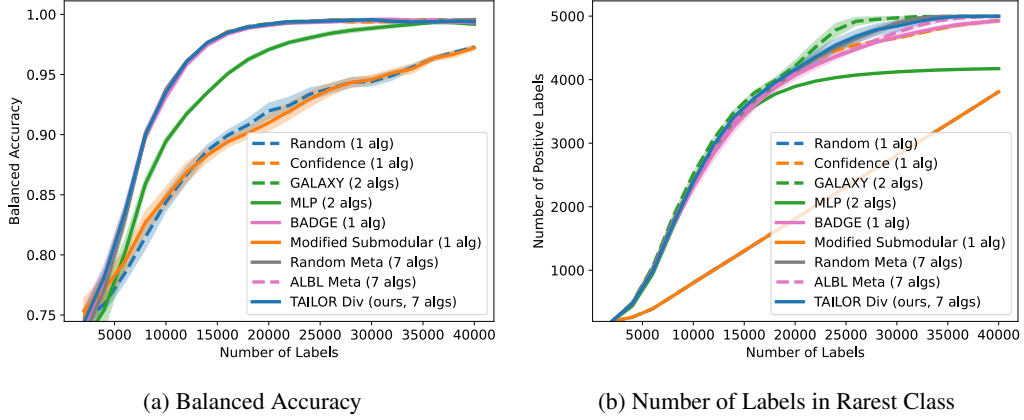

Figure 11: CIFAR-10, 2 classes

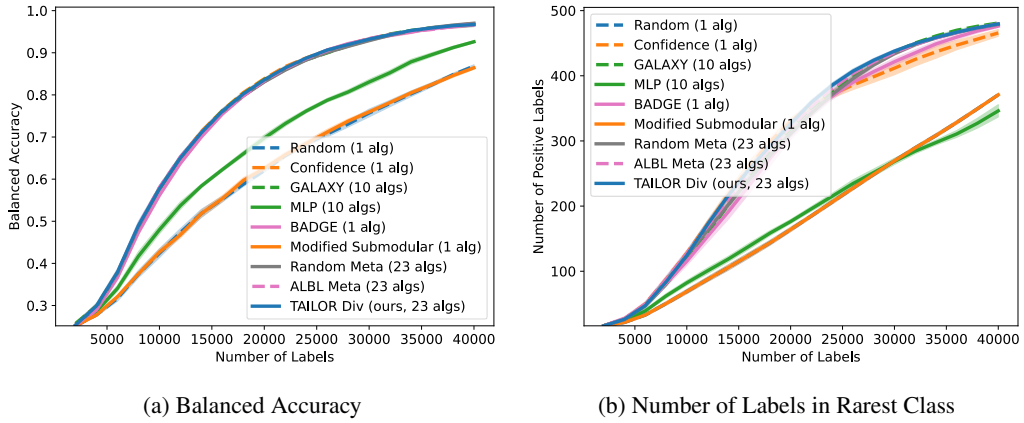

Figure 12: CIFAR-100, 10 classes

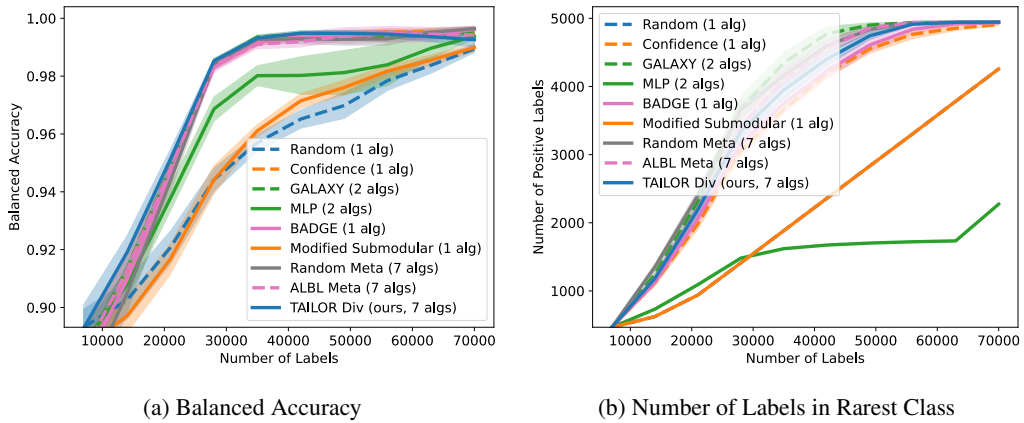

Figure 13: SVHN, 2 classes



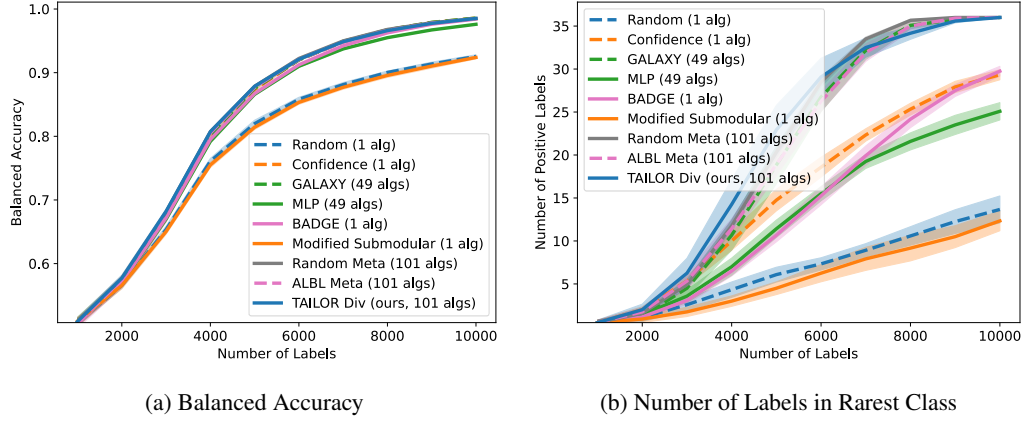

Figure 14: Kuzushiji-49

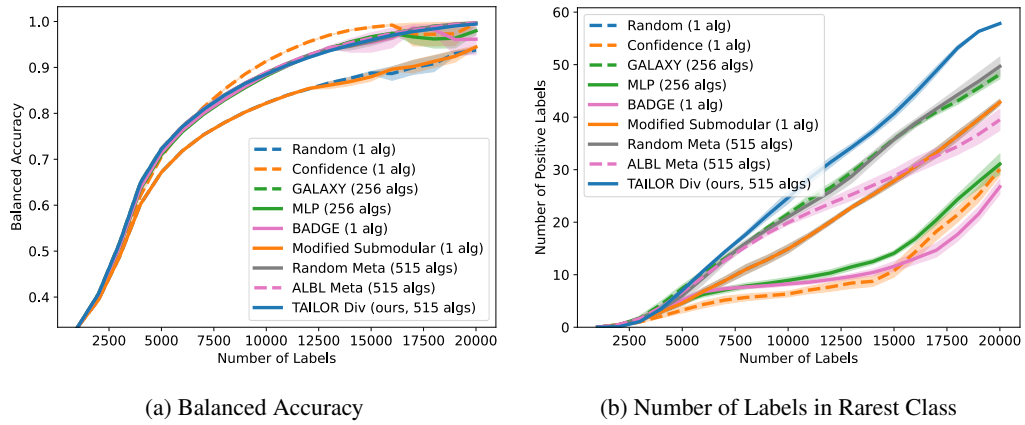

Figure 15: Caltech256

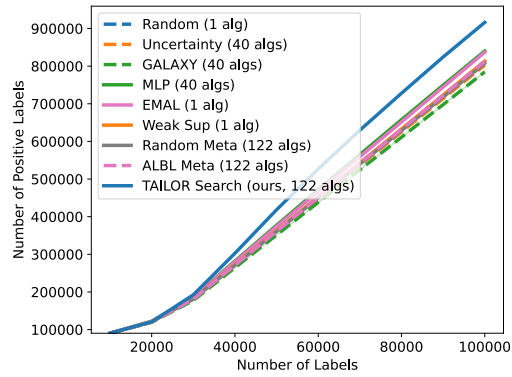

Figure 16: CelebA, Total Number of Positive Labels

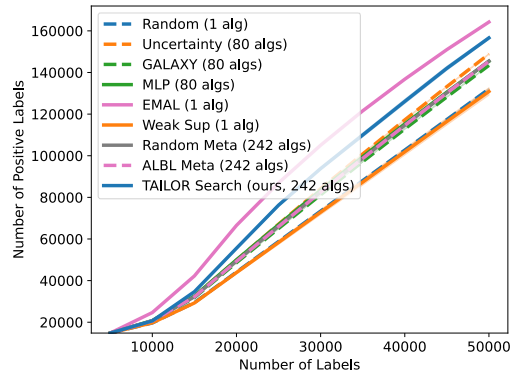

Figure 17: COCO, Total Number of Positive Labels

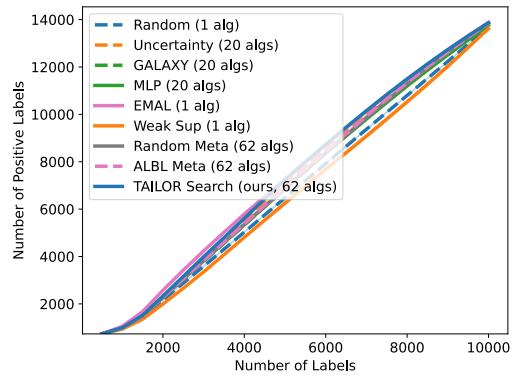

Figure 18: VOC, Total Number of Positive Labels

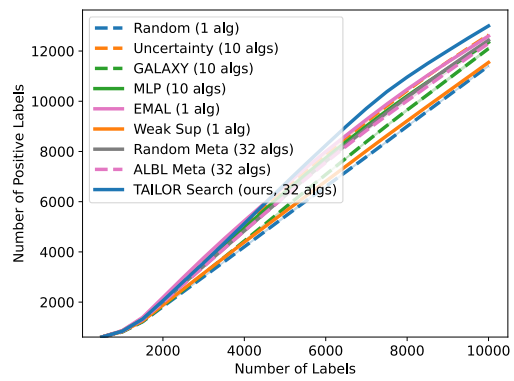

Figure 19: Stanford Car, Total Number of Positive Labels

## 615 F What Algorithms Does TAILOR Choose?

616 In the following two figures, we can see TAILOR chooses a non-uniform set of algorithms to focus on  
 617 for each dataset. On CelebA, TAILOR out-perform the best baseline, EMAL sampling, by a significant  
 618 margin. As we can see, TAILOR rely on selecting a *combination* of other candidate algorithms instead  
 619 of only selecting EMAL.

620 On the other hand, for the Stanford car dataset, we see TAILOR 's selection mostly align with the  
 baselines that perform well especially in the later phase.

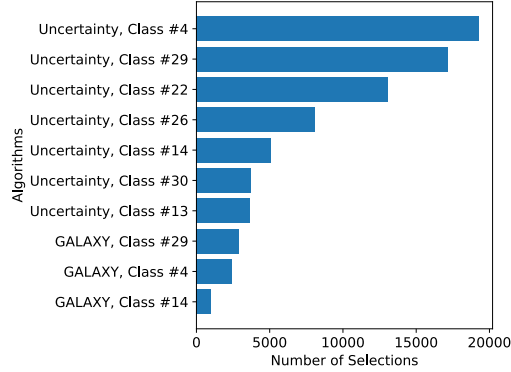

Figure 20: TAILOR Top-10 Most Selected Candidate Algorithms on CelebA Dataset

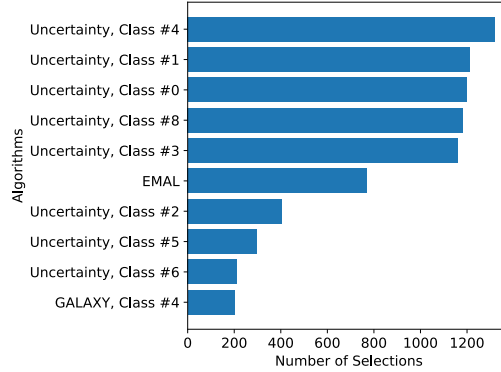

Figure 21: TAILOR Top-10 Most Selected Candidate Algorithms on Stanford Car Dataset

621

622 In the following figures, we plot the number of times the most frequent candidate algorithm is chosen.  
 623 As can be shown, TAILOR chooses candidate algorithm much more aggressively than other meta  
 624 algorithms in eight out of the ten settings.

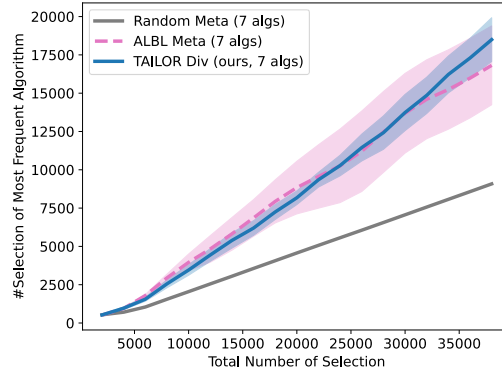

Figure 22: CIFAR-10, 2 Classes, Number of Pulls of The Most Frequent Selection

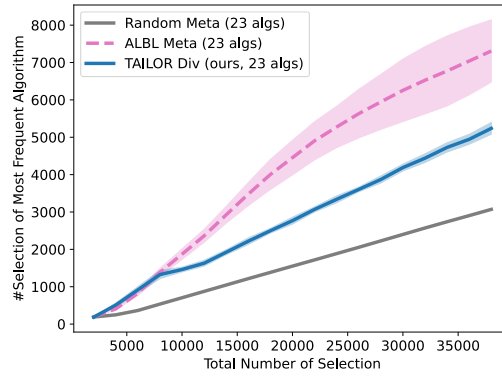

Figure 23: CIFAR-100, 10 Classes, Number of Pulls of The Most Frequent Selection

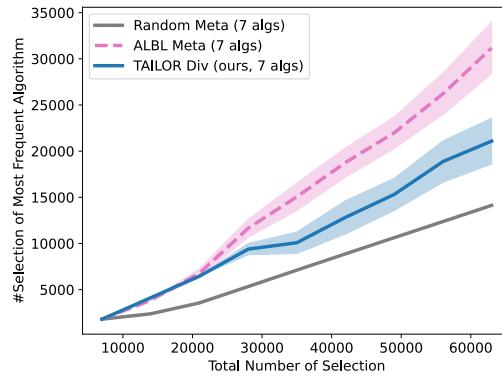

Figure 24: SVHN, 2 Classes, Number of Pulls of The Most Frequent Selection

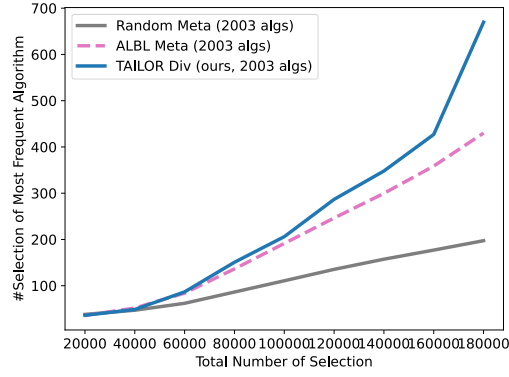

Figure 25: ImageNet-1k, Number of Pulls of The Most Frequent Selection

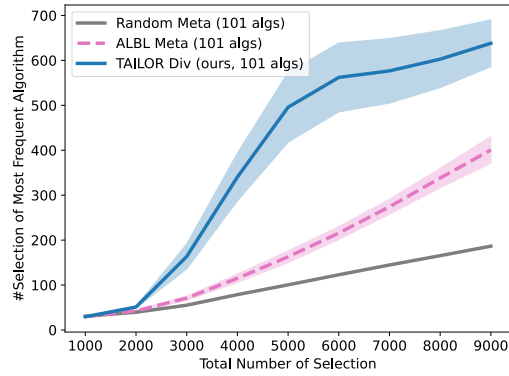

Figure 26: Kuzushiji-49, Number of Pulls of The Most Frequent Selection

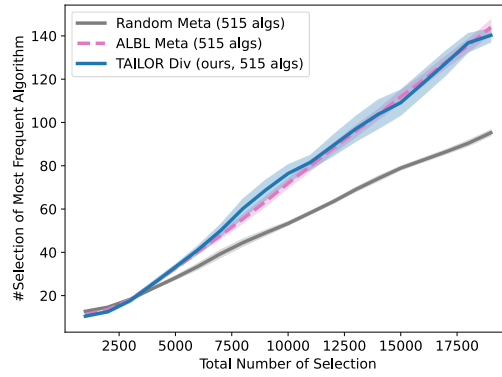

Figure 27: Caltech256, Number of Pulls of The Most Frequent Selection

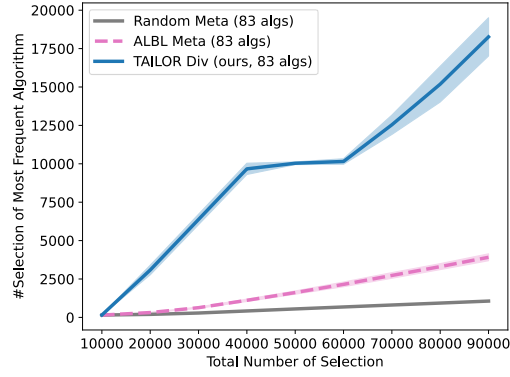

Figure 28: CelebA, Number of Pulls of The Most Frequent Selection

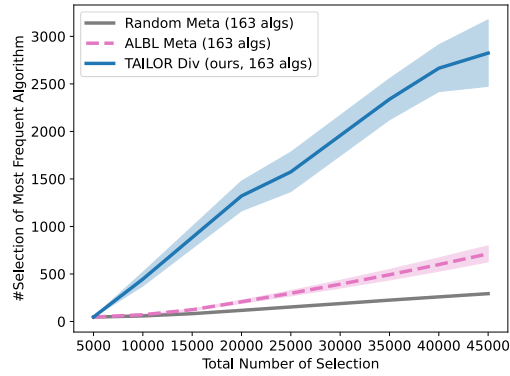

Figure 29: COCO, Number of Pulls of The Most Frequent Selection

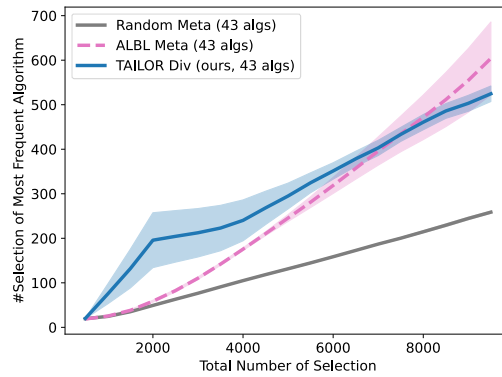

Figure 30: VOC, Number of Pulls of The Most Frequent Selection

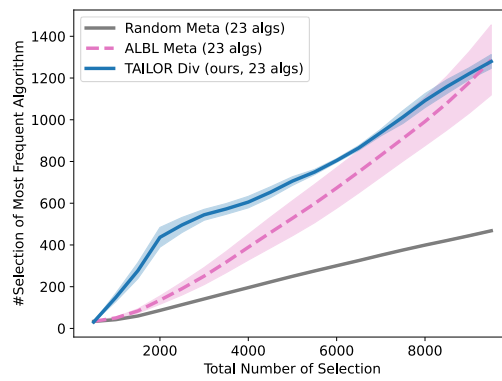

Figure 31: Stanford Car, Number of Pulls of The Most Frequent Selection
